# Supplementary material for: Tumor cells rely on the thiol oxidoreductase PDI for PERK signaling in order to survive ER stress
Source: PubMed Central journal article supplement (PMC7499200; doi:10.1038/s41598-020-72259-1), 2020-09-17
Supplement: 41598_2020_72259_MOESM1_ESM.pdf [file 41598_2020_72259_MOESM1_ESM.pdf]

# **Tumor cells rely on the thiol oxidoreductase PDI for PERK signaling in order to survive ER stress**

Philip Kranz, Christopher Sanger, Alexandra Wolf, Jennifer Baumann, Eric Metzen,  
Melanie Baumann, Kirsten Gopelt, Ulf Brockmeier<sup>1</sup>

Institut fur Physiologie, Universitat Duisburg-Essen, Germany

<sup>1</sup> Corresponding author: Dr. Ulf Brockmeier, PhD, Department of Neurology,  
University Hospital Essen, University Duisburg-Essen, Germany, Email  
ulf.brockmeier@uni-due.de

# Supplementary data

A

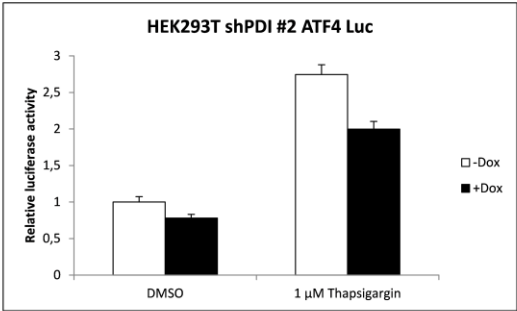

B

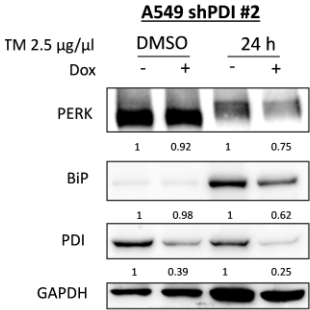

C

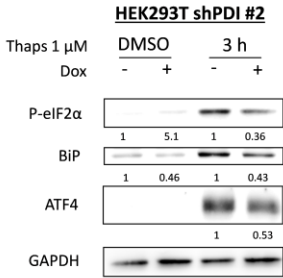

D

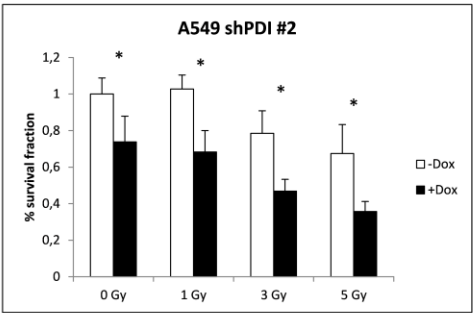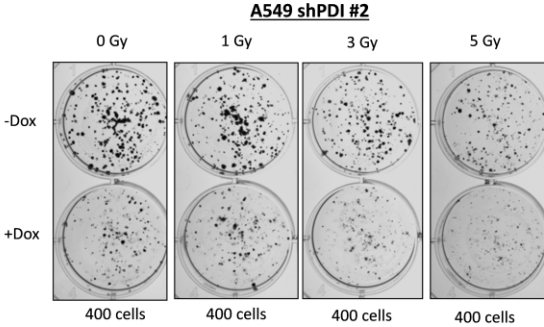

**Figure S1: Key experiments with second shRNA (A)** ATF4 luciferase assay in HEK293T shPDI #2 cells after 96 h of KD induction and 20 h treatment with 1 μM thapsigargin. **(B)** A549 shPDI #2 cells were treated with 2.5 μg/ml tunicamycin (TM) for 24 h after 48 h of KD induction and expression of PERK, BiP, PDI and GAPDH were tested by western blotting. **(C)** HEK293T shPDI #2 cells were treated with DMSO or 1 μM thapsigargin (Thaps.) for 3 h after 72 h of KD induction. Phosphorylation of eIF2α and expression of BiP, ATF4 and GAPDH were tested by western blotting. **(D)** Colony formation assay of A549 shPDI #2 cells irradiated with 0, 1, 3 and 5 Gy. Survival fraction is presented in bar graphs and representative images of colonies formed in 6-Well plates are shown. In subfigures B and C, densitometry was used to quantify protein band intensity. After *normalization to GAPDH*, the induced KD sample (+Dox) was compared to its control sample (-Dox, set to 1).
